1 Genomic analysis of the four ecologically distinct cactus host populations of *Drosophila*  
2 *mojavensis*

3

4 Carson W. Allan<sup>1,2</sup> and Luciano M. Matzkin<sup>1,2,3,4\*</sup>

5

6 <sup>1</sup> Department of Biological Sciences, University of Alabama in Huntsville, 301 Sparkman  
7 Drive, Huntsville, AL 35899, USA

8 <sup>2</sup> Department of Entomology, University of Arizona, 1140 E. South Campus Drive,  
9 Tucson, AZ 85721, USA

10 <sup>3</sup> BIO5 Institute, University of Arizona, 1657 East Helen Street, Tucson, AZ 85721, USA

11 <sup>4</sup> Department of Ecology and Evolutionary Biology, University of Arizona, 1041 E. Lowell  
12 St., Tucson, AZ 85721, USA

13

14 \* Corresponding author:

15 Luciano M. Matzkin

16 [lmatzkin@email.arizona.edu](mailto:lmatzkin@email.arizona.edu)

17 (520) 621-1955

18

19

20 **Abstract**

21 **Background:** Relationships between an organism and its environment can be  
22 fundamental in the understanding how populations change over time and species arise.  
23 Local ecological conditions can shape variation at multiple levels, among these are the  
24 evolutionary history and trajectories of coding genes. This study examines the rate of  
25 molecular evolution at protein-coding genes throughout the genome in response to host  
26 adaptation in the cactophilic *Drosophila mojavensis*. These insects are intimately  
27 associated with cactus necroses, developing as larvae and feeding as adults in these  
28 necrotic tissues. *Drosophila mojavensis* is composed of four isolated populations  
29 across the deserts of western North America and each population has adapted to utilize  
30 different cacti that are chemically, nutritionally, and structurally distinct.

31 **Results:** High coverage Illumina sequencing was performed on three previously  
32 unsequenced populations of *D. mojavensis*. Genomes were assembled using the  
33 previously sequenced genome of *D. mojavensis* from Santa Catalina Island (USA) as a  
34 template. Protein coding genes were aligned across all four populations and rates of  
35 protein evolution were determined for all loci using a several approaches.

36 **Conclusions:** Loci that exhibited elevated rates of molecular evolution tended to be  
37 shorter, have fewer exons, low expression, be transcriptionally responsive to cactus  
38 host use and have fixed expression differences across the four cactus host populations.  
39 Fast evolving genes were involved with metabolism, detoxification, chemosensory  
40 reception, reproduction and behavior. Results of this study gives insight into the  
41 process and the genomic consequences of local ecological adaptation.

42

43 **Keywords:** Genome evolution, adaptation, Drosophila, ecological genomics, genome  
44 sequencing, genome assembly

## 45 **Background**

46       Increasing availability of whole-genome sequencing data provides new insights  
47 into the complex relationship between an organism and its environment. By examining  
48 changes in the genetic code both at the level of individual genes and at the whole-  
49 genome level it is possible to gain a better understanding of how local ecological  
50 conditions can shape the pattern of variation within and between ecologically distinct  
51 populations [1, 2]. A comprehensive integrative approach combining genomic,  
52 phenotypic and fitness data has been identified as the gold standard in understanding  
53 the adaptation process [3, 4]. Yet, an examination of the genomic divergence of  
54 ecologically distinct populations can yield valuable insight into the adaptation process  
55 especially when the genomic data is placed in an ecological context [5]. This later  
56 approach can identify genomic regions and loci that exhibit a pattern of variation and  
57 evolution suggesting their role in local ecological adaptation. Furthermore, a  
58 consequence of the fixation of ecologically-relevant variants has been implicated in the  
59 evolution of barriers to gene flow and potentially the origins of reproductively isolated  
60 populations, i.e. species [6, 7].

61       While it has long been accepted that natural selection is a primary driver of  
62 change within species as a response to environmental pressures, understanding the  
63 mechanism of how this selection leads to speciation is unclear [8, 9]. More recently the  
64 idea of ecological speciation, where various mechanisms work to prevent gene flow  
65 between populations causing reproductive isolation and eventually speciation, has more  
66 directly shown how selection to local ecological conditions may affect the process of  
67 speciation [6, 7]. Reproductive isolation interrupts gene flow between populations and

68 may potentially lead to the formation of new species [10]. When different populations of  
69 a species inhabits and/or utilizes distinct resources this opens many possibilities for  
70 local differentiation that can lead to obstacles of gene flow as these populations are  
71 likely to have differing environmental pressures [6, 7]. For example, in the leaf beetle  
72 *Neochlamisus bebbianae*, different populations have distinct host preferences and  
73 larvae perform significantly worse when growing on alternative host species [8]. Host  
74 preferences and performance in this system facilitates the genetic and genomic  
75 isolation observed between the host populations, as each prefers a different  
76 microenvironment and likely does not interact and hybridize with members of the other  
77 population [11, 12].

78 Comparative genomic studies in mammals have shown clear evidence of positive  
79 selection both between humans, mice, and chimpanzees as well as between human  
80 populations [13-16]. Genes involved in the immune system, gamete development,  
81 sensory perception, metabolism, cell motility, and genes involved with cancer were  
82 those found to have signatures of positive selection. While in *Drosophila*, a genome  
83 level analysis of 12 species provided insight into the evolution of an ecological,  
84 morphological, physiological and behaviorally diverse genus [17]. Findings were  
85 relatively consistent with previously studies in other taxa with genes involving defense,  
86 chemosensory perception, and metabolism shown to be under positive selection [6, 13,  
87 16, 18]. Since the *Drosophila* 12 genome project [17], several population genomics  
88 studies in *D. melanogaster* have examined variation within a single population, between  
89 clinal populations and between ancestral (African) and cosmopolitan populations to  
90 assess the consequence of population subdivision, evolution of quantitative trait

91 variation and the adaptation to local ecological conditions [19-24]. These genome level  
92 analysis have been extended to other *D. melanogaster* species group flies with distinct  
93 life history and ecological strategies such as the *Morinda citrifolia* specialist *D. sechellia*  
94 [25] and the invasive agricultural pest *D. suzukii* [26].

95         Studying the sequence level constraints as well as functional categories and  
96 networks associated with genes under positive selection is paramount to understanding  
97 the process of evolutionary change. However, it is crucial to place patterns of variation  
98 and divergence in an ecological context to have a more complete view how selection  
99 shapes variation within and between populations. In this study we explore the link  
100 between ecology and patterns of genome-wide sequence variation in *D. mojavensis*, a  
101 fruit fly endemic to the southwestern United States and northwestern Mexico that has  
102 become a model for the understanding of the genetics of adaptation [27]. This species  
103 of *Drosophila* is a cactophile in that both larval and adult stages reside and feed in  
104 necrotic cactus tissues [28]. *Drosophila mojavensis* has four distinct host populations  
105 that are geographically separated (Fig. 1). In addition to geographic separation each  
106 population lives on a distinct cactus host species. The four populations are: Santa  
107 Catalina Island living on prickly pear cactus (*Opuntia littoralis*), Mojave Desert living on  
108 barrel cactus (*Ferocactus cylindraceus*), Baja California living on agria cactus  
109 (*Stenocereus gummosus*), and Sonoran Desert living on organpipe cactus (*S. thurberi*).  
110 *Drosophila mojavensis* diverged from its sister species *D. arizonae*, a cactus generalist,  
111 approximately half a million years ago [29-32] with the divergence between *D.*  
112 *mojavensis* populations being more recent (230,000 to 270,000 years ago) [33].  
113 Differing host species provide different local environments for each *D. mojavensis*

114 populations. The necrotic cactus environment in which these flies reside is composed  
115 not only of plant tissues, but a number of bacteria and yeast species [34-37]. In addition  
116 to nutritional differences between the necrotic cactus host, several of the compounds  
117 found therein have toxic properties [38-40]. This selective pressure has resulted in the  
118 fixation of variants that facilitate the survival of *D. mojavensis* and other cactophilic  
119 *Drosophila* species to their local necrotic cactus environment [28, 41].

120         Population genetics on individual candidate host adaptation genes in *D.*  
121 *mojavensis* has shown evidence for positive selection in loci involved with xenobiotic  
122 metabolism [31]. In addition, transcriptome-wide differences have been observed in *D.*  
123 *mojavensis* in response to host shifts [42, 43] as well as indicating fixed expression  
124 differences between the host populations [44]. Among the loci that are differentially  
125 expressed or constitutively fixed between populations many are involved in  
126 detoxification, metabolism, chemosensory perception and behavior, supporting the role  
127 of the local necrotic cactus conditions in shaping transcriptional variation [42-44].  
128 Taking into consideration the breadth of ecological information of *D. mojavensis* this  
129 study highlights how selection pressures caused by local ecological environments  
130 differentially shape patterns of genomic variation across the host populations and  
131 provides further insight into how selection acts on organisms and its genome level  
132 consequences.

133

134 **Results**

135           Number of cleaned reads and the number assembled to the Catalina Island  
136 reference genome are shown in Table 1. All three populations had approximately 88  
137 percent of paired-end reads successfully assembled. Mate pair reads had lower rates  
138 of mapping ranging from 27 percent to 63 percent. Of the 14,680 loci annotated in the  
139 reference genome the vast majority were also present in our template-based  
140 assemblies of the other three populations. Of these annotations, a common set of  
141 12,695 were initially processed that did not lack any premature stop codons. From this  
142 common set of loci we filtered out those that among the four populations exhibited either  
143 less than five total, zero nonsynonymous, or zero synonymous substitutions. This  
144 yielded a working set of 9,087 loci for which all subsequent analyzes were performed.  
145 The list of all loci examined, summary data, test statistics, and *D. melanogaster* ortholog  
146 information can be found in Additional file 1: Table S1.

147

#### 148 **Characteristics and patterns of divergence of *D. mojavensis* loci**

149           Estimates of  $\omega$  ( $K_a/K_s$ ) were calculated using both KaKs Calculator [45] and  
150 codeml in PAML [46]. Given the  $\omega$  values were highly correlated ( $r^2 = 0.88$ ,  $P < 0.001$ ;  
151 see Additional file 2: Figure S1) all subsequent analyses were performed using the  
152 values from codeml. The distribution of  $\log_2$  transformed  $\omega$  are shown in Figure S2.  
153 Overall a total of 190 loci exhibited  $\omega$  values greater than one. When examined per  
154 chromosome (Muller Element), we observed that the dot chromosome (Muller F) had  
155 the greatest mean  $\omega$ , followed by the chromosomes for which segregate chromosomal



156 inversions (Muller B and E) and than those chromosomes that lack inversions (Muller A,  
157 C and D) (Fig. 2, Additional File 2: Table S2).

158 To describe the characteristics of loci whose evolutionary trajectory could have  
159 been shaped by the adaptation of *D. mojavensis* populations to their respective  
160 ecological conditions we examined loci with  $\omega$  values in the top 10% of the distribution,  
161 hereafter referred to as TOP10 loci. Furthermore, using codeml we performed a series  
162 of gene-wide tests of positive selection for each individual locus. Via a maximum  
163 likelihood rate test (model 7 vs. model 8) we identified 912 loci that exhibited a pattern  
164 of adaptive protein evolution. We used a smaller set of 244 loci, following an FDR  
165 correction, for all subsequent analyses, hereafter referred to as PAML-FDR loci. The  
166 set of TOP10, PAML significant loci and those with an FDR correction (PAML-FDR) can  
167 be found in Additional file 1: Table S1. The distribution of both the PAML-FDR and  
168 TOP10 loci was uniform across the *D. mojavensis* chromosomes (Additional file 2:  
169 Figure S3 and S4), with the exception that significantly fewer PAML-FDR genes were  
170 present in Muller E (Fisher's Exact test,  $P = 0.02$ ).

171 Significant differences in  $\omega$  values were observed across loci of differing protein  
172 coding lengths (Fig. 3). Loci smaller than 1 Kb exhibit significantly higher rate of  
173 molecular evolution, followed by those 1-2 Kb and then by gene categories of longer  
174 lengths (Additional file 2: Table S3). A similar pattern of  $\omega$  values was observed for the  
175 TOP10 loci, where a significant excess of the smaller gene group (< 1 Kb) was  
176 composed of TOP10 loci, and a significantly fewer were observed in the greater than 4  
177 Kb bin (Additional file 2: Figure S5). Although the overall  $\omega$  was greater in shorter loci,  
178 the proportion of these loci who exhibited a significant pattern of positive selection was

179 significantly less (Additional file 2: Figure S6). Similarly to what was observed for gene  
180 length, genome-wide, loci with fewer exons tended to have greater levels of  $\omega$ , with the  
181 highest observed was from loci having two exons, then those with either only one or  
182 three exons, followed by those having four to six exons and lastly those with seven or  
183 more (Additional file 2: Figure S7, Table S4). TOP10 loci were overrepresented in the  
184 one and two exon categories and underrepresented in the more than seven exon  
185 category, whereas the PAML-FDR loci were uniformly distributed across all exon  
186 number categories (Additional file 2: Figures S8 and S9).

187

## 188 **Relationship between expression and rate of molecular evolution**

189 To assess the relationship between expression level and rate of molecular  
190 evolution we integrated our results with previously collected RNAseq data from *D.*  
191 *mojavensis* [47]. When examined genome-wide, genes with male-biased expression  
192 had significantly greater  $\omega$  values than female-biased (Tukey HSD,  $P < 0.001$ ) and  
193 unbiased (Tukey HSD,  $P < 0.001$ ) expressed genes, and female-biased genes had the  
194 lowest rate (Tukey HSD,  $P < 0.001$ ) of molecular evolution of all three expression  
195 categories (Additional file 2: Figure S10, Table S5). Among the TOP10 loci, there was a  
196 significant representation of them in the male-biased group of genes and a significant  
197 underrepresentation in the female-biased genes (Fig. 4). No significant over- or  
198 underrepresentation was observed among the PAML-FDR genes with respect to the  
199 sex biased expression categories (Additional file 2: Figure S11). Expression data was  
200 also used to assess the relationship between overall expression level and rate of

201 molecular evolution. After removing both the female- and male-biased genes, we  
202 observed that of the 5,101 remaining loci those in the lowest expression category  
203 showed the greatest  $\omega$  values (Additional file 2: Figure S12, Table S6). Similarly the  
204 TOP10 loci were overrepresented among the low expression category of loci and no  
205 differences were observed among the expression categories of the PAML-FDR loci  
206 (Additional file 2: Figures S13 and S14).

207 We also integrated our genomic data with two prior ecological transcriptional  
208 studies. We compare rates of molecular evolution of loci that are differentially expressed  
209 in response to cactus host utilization [43] as well as those loci who exhibit fixed  
210 significant expression differences between the four host populations in the absence of  
211 cactus compounds (i.e. constitutive differences) [44]. To remove the potential  
212 confounding effect of those loci that show a pattern of positive selection, we removed  
213 those loci from the subsequent expression analysis. For both datasets, loci that are  
214 either differentially expressed in response to necrotic cactus ( $P < 0.001$  post FDR  
215 correction) or those that show constitutive differences between the populations ( $P <$   
216  $0.001$  post FDR correction) have a significantly greater value of  $\omega$  (ANOVA,  $P < 0.001$ ,  
217 for both comparisons) (Additional file 2: Figures S15, Table S7).

218

## 219 **Functional gene groups analysis**

220 Of our 9,087 genes in our filtered dataset, approximately 14% (1,238) genes did  
221 not have orthologous calls back to loci in the *D. melanogaster* reference genome  
222 (Additional file 2: Figure S16). Of the remaining set of genes with *D. melanogaster*

223 orthologs, less than half of the genes (3,649) had at least one gene ontology (GO) term.  
224 The percentage of loci without *D. melanogaster* orthologous in the TOP10 and PAML-  
225 FDR genes was greater (40% and 23%, respectively). Overall only 336 and 144 loci  
226 had at least one GO term for the TOP10 and PAML-FDR datasets, respectively.  
227 Clustering of biological process and molecular function GO terms within the TOP10 and  
228 PAML-FDR dataset illustrated some distinct functional groups. Fig. 5 illustrates the  
229 biological process functional clusters for TOP10 genes, in which clusters associated  
230 with reproduction/development, detoxification and response to stimuli, and behavior are  
231 present. A network analysis of the same set of loci indicates similar functional networks  
232 as well as those associated with defense and chromatin regulation and remodeling (Fig.  
233 6). Functional and network clustering for molecular function GO terms, KEGG and the  
234 PAML-FDR dataset can be found in Additional file 2: Figures S17-S20, Additional file 3:  
235 Table S11. Among molecular functions, in the TOP10 dataset, serine endopeptidase  
236 activity appeared to be overrepresented (Additional file 2: Table S8).

237

## 238 **Discussion**

239 In this study we sequenced, assembled and analyzed the genomes of each of  
240 the four cactus host populations of *D. mojavensis* for the purpose of assessing the  
241 genomic consequences of the adaptation to local ecological conditions. Overall we  
242 were able to analyze the sequence, pattern of divergence and structure of 9,087 genes.  
243 And although the four genomes examined diverged relatively recently [29-33], for

244 several loci, sufficient number of substitutions occurred for us to begin to assess the  
245 changes associated with cactus host adaptation.

246 Unlike what is present in *D. melanogaster*, *D. mojavensis* chromosomes are all  
247 acrocentric and its karyotype is composed of six Muller elements [48]. In *D.*  
248 *melanogaster* element A is the X chromosome and elements B/C and D/E form large  
249 metacentric chromosomes (2L/2R and 3L/3R, respectively), while the F element or dot  
250 chromosome is reduced in sized and highly heterochromatic [49, 50]. In *D. mojavensis*  
251 we observed the highest rate of molecular evolution in the small F element, followed by  
252 elements B and E, and then the remaining autosomal elements and the X chromosome  
253 (Fig. 2).

254 Selection on the X chromosome has been examined in a number of studies with  
255 somewhat variable results [51]. Analysis of several melanogaster group species has  
256 shown significant elevated  $\omega$  values for genes on the X chromosome [17]. From  
257 population genetics theory it is generally predicted that the X chromosome would show  
258 elevated rates of evolution due to its reduced population size and level of  
259 recombination [51]. A subsequent genomic analysis of the X chromosome across  
260 more distant *Drosophila* species (*D. melanogaster*, *D. pseudoobscura*, *D. miranda* and  
261 *D. yakuba*) failed to find evidence of increased protein evolution on the X chromosome  
262 [52]. It is difficult to make any conclusions about the lack of a pattern of accelerated X  
263 chromosome evolution found here, it may be possible that there has not been enough  
264 divergence time between these populations for influences such as effective population  
265 size to have a measurable effect. The greatest  $\omega$  values were present in the dot  
266 chromosome which in *D. mojavensis* is heterochromatic and has a highly reduced level

267 of recombination [53], which would make it highly susceptible to sweeps and hence  
268 higher rates of molecular evolution.

269 Within *D. mojavensis* there are polymorphic inversions in Muller elements B and  
270 E [54], both exhibited overall higher chromosomal-wide levels of  $\omega$  (Fig. 3). Lower  
271 levels of recombination and higher divergence rates have been known to occur around  
272 the inversion breakpoint regions in *Drosophila* [55]. One possible explanation for the  
273 elevated rates of molecular evolution in these chromosomes is the distinct karyotypes of  
274 the sequenced lines (Additional file 2: Table S9). One consequence of a template-  
275 based assembly as performed in this study, is that chromosomal structural differences  
276 can be largely wiped away. A more detailed analysis of the consequence of  
277 chromosomal inversion on the evolutionary trajectories of associated loci will be  
278 performed in future analyses of *de novo* assemblies of *D. mojavensis* genomes from all  
279 host populations as well as from sibling species (*D. arizonae* and *D. navojoa*)  
280 (unpublished data, Matzkin).

281 Genes across the genome as well as those evidence of positive selection or in  
282 the top 10 percent of  $\omega$  values were assessed for a number of characteristics.  
283 Genome-wide loci exhibiting greater  $\omega$  values tended to be shorter, have fewer exons (3  
284 or less), have low expression, be differentially expressed in response to cactus host use  
285 and have fixed expression differences across the four cactus host populations of *D.*  
286 *mojavensis* (Fig. 3; Additional file 2: Figures S7, S12, S15). Overall this pattern of  
287 divergence was similar when examining the TOP10 or PAML-FDR loci. Previous  
288 genomic analyses in *D. melanogaster* and related species have observed similar  
289 characteristics of loci with elevated  $\omega$  values. This indicates that although the

290 phylogenetic scale of the present study is limited (within *D. mojavensis*) the forces  
291 shaping genome evolution between diverged species can also be observed between  
292 recently isolated populations within species.

293         The first comparative genomic study within the *D. melanogaster* group species  
294 [56] observed an association between coding length and  $\omega$ , which they partially  
295 attributed to a positive correlation between  $K_s$  and protein length. Longer genes have  
296 more of these mutations and this may explain in part why genes with high  $\omega$  values are  
297 likely to be shorter. In this study we did not observe such correlation, in fact the  
298 relationship is negative ( $P < 0.001$ ), but explains very little of the variation in  $K_s$  ( $r^2 =$   
299  $0.004$ ) (Additional file 2: Figure S21). Therefore, it is difficult to infer the effect of the  
300 association between  $K_s$  and protein length, and the lack of positive correlation might be  
301 a function the close relationship between the genomes studied here. The negative  
302 association between intron number and rate of molecular evolution has been previously  
303 suggested to be due to the presence of exonic splice site enhancers which help in the  
304 correct removal of introns from the transcription sequence. As mutations in these  
305 regions are more likely to be conserved changes here could cause an intron to not be  
306 removed or part of an exon to be removed instead [57]. The link between intron  
307 presence and  $\omega$  values may also help explain why TOP10 genes tend to be shorter as  
308 long genes are more likely to have introns [58]. The correlation between gene length  
309 and rate of molecular evolution could also be explained as a result of the increased  
310 level of interactions between sites in larger exons [59]. In this study a negative  
311 correlation between  $\omega$  and exon length ( $r^2 = 0.08$ ,  $P < 0.001$ ) was observed (Additional  
312 file 2: Figure S22). These interactions between residues of a protein, commonly refer to

313 as Hill-Robertson interference [60], have a tendency to buffer against the accumulation  
314 of amino acid substitutions.

315         Highly expressed genes tend to have a higher level of constraint as indicated by  
316 the tendency of having lower rates of molecular evolution. This has been previously  
317 explained as being a result of selection against mutations that alter transcriptional and  
318 translational efficiency as well as selection for the maintenance of correct folding  
319 (translational robustness) [56, 61-65]. Given our coarse transcription data we were not  
320 able to tease apart which of the above-mentioned forces might more strongly shape the  
321 rate of molecular evolution. Nonetheless we observed a clear negative relationship  
322 across the four *D. mojavensis* genomes between transcriptional level and  $\omega$ . In addition  
323 to overall expression, both tissue and sex-bias expression have been known shape the  
324 evolutionary trajectories of genes [66-68]. Male, or more specifically testes expressed  
325 genes have been associated with elevated rates of molecular evolution in *Drosophila*  
326 and across many taxa [69]. Many of these loci are believed to be under strong sexual  
327 selection, which would explain their accelerated rate of molecular evolution. As  
328 predicted we observed an overall higher rate of molecular evolution in male-biased  
329 genes. Even female-biased loci exhibited a significant greater  $\omega$  than unbiased genes.  
330 Previous behavioral and molecular studies in *D. mojavensis* have shown that this  
331 species is experiences strong and recurrent bouts of sexual selection [70-77].

332         Loci indicating a pattern of positive selection and those with elevated  $\omega$  appear to  
333 be associated with a wide range of metabolic processes. These changes are likely a  
334 result of the distinct nutritional and xenobiotic environment the distinct *D. mojavensis*  
335 populations experience. The chemical composition of the cacti and the species of yeast



336 found in each rot varies [34-41] and thus the populations have likely needed to optimize  
337 the recognition, avoidance and processing of these necrosis-specific compounds  
338 through changes in metabolism, physiology and behavior.

339           One aspect of metabolism that has likely been shaped by cactus host adaptation  
340 is the detoxification of cactus compounds, as the distinct cactus hosts have different  
341 chemical compositions. Expression studies have shown that genes involved in  
342 detoxification are enriched when flies develop in an alternative necrotic cactus species.  
343 Fitness costs of living on the alternative cactus have also been shown to be quite high  
344 with those flies having low viability (< 40%) [43, 78, 79]. Out of all GO terms examined  
345 in this study, the only ones that were consistently overrepresented were those  
346 associated with serine-type endopeptidase activity. These type of proteins perform a  
347 number of function within organisms, among them is their targeting of  
348 organophosphorus toxins [80]. These compounds are often used in pesticides and are  
349 found to inhibit serine hydrolase function in both insects and vertebrates [80]. While the  
350 apparent positive selection on these genes may be directly due to development of  
351 resistances to pesticides they might experience in the field, but more likely they may be  
352 evolving in response to the effects of toxic or nutritional compounds found in cactus  
353 rots.

354           Cactophilic *Drosophila* have been shown to deploy a number of enzymatic  
355 strategies to ameliorate the deleterious consequences of ingesting cactus necrosis-  
356 derived compounds. Many of the previously identified proteins playing a role in  
357 detoxification in cactophiles (Glutathione S-transferases, Cytochrome P450s, Esterases  
358 and UDP-glycosyltransferase) have been associated with detoxification in a broad

359 number of taxa [81-85]. In fact, in recent comparative genomic analysis of the  
360 cactophilic *D. buzzatii* [86] and *D. aldrichi* [87], a number of metabolic genes, including  
361 those associated with detoxification were shown to be under positive selection. In the  
362 present genomic analysis of the *D. mojavensis* genome we observed the largest  
363 functional cluster (Fig. 5) was composed of several genes belonging to known  
364 detoxification protein families, such as Cytochrome P450 and Glutathione S-  
365 transferases (Gst). Furthermore, previous transcriptional studies have indicated that  
366 these same categories of detoxification loci are differentially expressed when *D.*  
367 *mojavensis* are utilizing necrotic cactus tissues [42, 43]. A population genetics analysis  
368 of *GstD1* has indicated a pattern of adaptive amino acid evolution at this locus in the  
369 Sonora and Baja California populations [31]. The location of the fixed residue fixed in  
370 the lineages leading to these two populations indicated potential functional  
371 consequences and a recent kinetic analysis of these proteins have support this  
372 prediction (Matzkin, unpublished data).

373         The diversity of bacterial species found on each necrotic cactus provides, directly  
374 or indirectly, nutritional resources for the fly populations, but also are composed of  
375 potentially distinct pathogenic organisms [88, 89]. A number of genes with elevated  
376 rates of molecular evolution in this study are linked to a range of processes involved  
377 with the immune response. As each population is faced with a different composition of  
378 threats, the evolutionary arms race between flies and their pathogens creates further  
379 divergence between the populations as they face different pathogenic landscapes.  
380 Studies in other species, such as *D. simulans*, have found that genes with immune  
381 related functions were found to have higher rates of positive selection than the genome

382 average [90]. Exposure to bacterial pathogens in *D. mojavensis* could occur while  
383 utilizing the necrotic cactus substrate, but as has been previously suggested [91], via  
384 sexual transmission.

385 A number of the TOP10 loci in this study perform functions associated with  
386 sensory perception and behavior (Fig. 6). *Drosophila mojavensis* larvae actively seek  
387 out patches of preferred yeast species [92] and across the four host populations there  
388 are distinct larval foraging strategies [93]. More specifically genes involved in  
389 chemosensory behavior were observed to have elevated  $\omega$  values in these genomes.  
390 Across Drosophilids, there have been a number of studies indicating the links between  
391 the evolution of chemosensory genes and host specialization [94-96]. In *D. sechellia*, a  
392 specialist species, was found to be losing olfactory receptor genes at a faster rate than  
393 its sibling generalist species *D. simulans* [97]. In *D. mojavensis* each cactus species rot  
394 contains different compounds and thus have a different set of volatiles emanating from  
395 the necroses [39, 40]. These chemical differences have shaped the feeding and  
396 oviposition behavior of flies as has been shown by the exposure of adults to cactus  
397 volatiles [98-100]. Recent analysis of populations differentiation in odorant and  
398 gustatory receptors have shown that unlike what might be initially predicted a number of  
399 the changes in these receptors suggests that effects at the level of signal transduction  
400 in addition to odorant recognition [101]. Further functional analysis is needed to better  
401 understand the evolution and functional changes of chemosensory pathways associated  
402 with the adaptation to necrotic cacti.

403 In addition to their role in xenobiotic metabolism, serine proteases have been  
404 shown to be involved in the network of proteins associated with reproductive

405 interactions in several taxa. In *D. melanogaster* accessory gland proteins (ACP), such  
406 as sex peptide, are found to perform a wide range of functions ranging from stimulating  
407 ovulation and reducing a female's remating rate to helping to defend against infections  
408 [102-104]. Knockouts of serine proteases have been shown to interfere with the  
409 behavioral and physiological effects of the male-derived sex peptide [104]. In *D.*  
410 *mojavensis* and its sister species *D. arizonae* a large number of proteases are  
411 expressed in female reproductive tracts and several have been shown to be under  
412 strong positive selection [73, 105-107]. In addition to ACPs being transferred via the  
413 ejaculate, gene transcripts have been found to be deposited by males into females  
414 during copulation [72]. Some of these male-derived transcripts could alter the female's  
415 transcriptional response, while other may potentially be translated within females.  
416 Furthermore, the loci of several of these male-transferred transcripts show a pattern of  
417 strong and continuous positive selection, likely as the result of persistent sexual  
418 selection [71]. While there seems to be no postzygotic effects of sexual isolation within  
419 the *D. mojavensis* populations there is some evidence of prezygotic isolation, where  
420 certain populations prefers to mate with members of its own population [76]. The  
421 pattern of positive selection and/or elevated rate of molecular evolution for proteases  
422 and reproductive loci in the present study may highlight the continuing genomic  
423 consequence of sexual selection in this species.

424

## 425 **Methods**

### 426 ***Drosophila mojavensis* lines and sample preparation**

427 Fly lines MJBC 155 collected in La Paz, Baja California in February 2001, MJ  
428 122 collected in Guaymas, Sonora in 1998, and MJANZA 402-8 collected in ANZA-  
429 Borrego Park, California in April 2002 were used as the source lines for the sequencing  
430 of three *D. mojavensis* populations. These lines were highly inbred to reduce the  
431 heterozygosity of their DNA. Summary of the karyotype of each of the lines sequenced  
432 as well as the Catalina Island template genome stock (15081-1352.00) can be found in  
433 Additional file 2: Table S9. The flies were grown for two generations in banana  
434 molasses media [93] supplemented with ampicillin (125 µg/ml) and tetracycline (12.5  
435 µg/ml), to prevent the isolation of bacterial DNA in addition to the flies'. DNA was  
436 extracted from homogenized whole male flies using a combination of phenol/chloroform  
437 DNA extraction and Qiagen DNeasy spin-columns to achieve the required amount of  
438 DNA material. RNase A was used to reduce RNA contamination. Gel electrophoresis  
439 was run on each sample to check the quality of the extraction. Any samples with RNA  
440 contamination were run through a Qiagen QIAquick PCR Purification Kit spin column to  
441 filter contaminants. Extracted DNA was sent to the HudsonAlpha Institute for  
442 Biotechnology Genomic Services Lab (Huntsville, Alabama) for sequencing. One  
443 hundred base pair paired-end and mate pair sequencing was done on an Illumina HiSeq  
444 2500 with one lane for each.

#### 445 **Genome assembly**

446 Paired-end and mate pair Illumina reads were filtered and trimmed using step  
447 one of the A5 Pipeline [108]. This step uses SGA [109] and TagDust [110] with the  
448 quality scores from the Illumina FASTQ files to reduce the number of low quality reads.  
449 A5 was run on the Dense Memory Cluster of the Alabama Super Computer Center with

450 four processing cores and 64 gigabytes of memory allocated for each run. With the  
451 reads cleaned they were assembled to the template genome. The reference genome of  
452 the Catalina Island population of *D. mojavensis* was assembled as part of the  
453 *Drosophila* 12 Genomes Consortium [17]. Version 1.04 of the reference genome was  
454 retrieved from FlyBase version FB2015\_02 [111]. From the reference sequence,  
455 genome scaffolds [112] containing the protein-coding genes previously mapped to a  
456 chromosome, were extracted for use as a template for the assembly; these scaffolds  
457 are detailed in Additional file 2: Table S10. The reference templates as well as the  
458 Illumina reads were imported into Geneious 8.1. Assembly was done separately for  
459 paired-end and mate pair data. Using Geneious 8.1 and its Map to Reference feature  
460 the cleaned reads were assembled to each of the template scaffolds. BAM files were  
461 exported for each paired-end and mate pair assembly. SAMtools [113] was used to  
462 merge BAM files to create an assembly with both types of reads. This merged BAM file  
463 was imported into Geneious 8.1 where consensus sequences were determined for each  
464 scaffold using majority calling to limit the number of ambiguities. GTF files for each  
465 scaffold used were retrieved from FlyBase version FB2015\_02 [111]. These  
466 annotations were transferred to each of the new genomes by aligning each assembled  
467 genome scaffold to the reference genome scaffold using Mauve Genome Alignment  
468 [114] with default settings except for selecting assume collinear genomes. After  
469 alignment, annotations were transferred from the reference to the new assembly. The  
470 resulting scaffolds were exported in GenBank format. Using the EMBOSS program,  
471 extractfeat [115], CDS sequences were extracted from the assembled scaffolds.  
472 Sequence files for each gene were concatenated and then aligned using the default

473 settings of the aligner Muscle 3.8.31 [116]. Only the longest transcript for each gene  
474 was used as some genes have multiple splice variants.

## 475 **Molecular evolution analysis**

476 To generate substitution counts for filtering, the software KaKs Calculator 1.2 [45]  
477 was used. Files of aligned genes were converted to AXT format using the Perl script  
478 parseFastalIntoAXT.pl including in the package. After conversion each gene was run  
479 through the software using the NG method [117]. The output files for each loci were  
480 concatenated and then imported into JMP 10 for filtering.

481 Values for  $\omega$  were calculated using codeml part of the PAML 4.9 package [46].  
482 Aligned genes were converted to PHYLIP format using BioPerl [118]. As PAML  
483 requires a phylogenetic tree to be provided for its calculations a neighbor joining tree  
484 was constructed in MEGA 5 [119]. This was done by concatenating all exons from each  
485 population and then aligning them using Mauve Genome Alignment [114]. The  
486 alignment was converted to MEG format using MEGA and a neighbor joining tree was  
487 built using the default settings. The tree was exported in newick format for use by  
488 PAML. Genes were removed from analysis if they were not divisible by three, these  
489 genes were manually screened and if alignment errors appeared to be the cause, these  
490 were manually corrected. Screening was done for stop codons within the sequences by  
491 translating the DNA sequence to protein sequence with Transeq, part of the EMBOSS  
492 package [115] and any genes with internal stop codons were removed.

493 Using the BioPython PAML module [120], control files were built for each gene  
494 alignment with default values taken except codon frequency was set to F3x4. Site-class

495 models 0 , 7, and 8 were used to calculate the  $\omega$  values [121-123]. Model 0 is a single  
496 ratio based omega value for the entire gene. Model 7 is a null model with 10 classes,  
497 which does not allow for positive selection while model 8 adds an additional class that  
498 allows for positive selection. Both the  $\omega$  values and log likelihood values were extracted  
499 from each output file and the data was organized in Microsoft Excel. If model 8  
500 significantly better fits the data this is evidence of positive selection [46]. Significance  
501 values were found by taking the difference between the log likelihood values of the two  
502 outputs and multiplying them by two. This value was then compared a chi-square  
503 distribution to find  $P$  values for each gene. Genes with less than five total substitutions  
504 as determined by KaKs Calculator [45] were filtered out and not considered. This was  
505 done to help deal with the low power of these methods when there are very few  
506 changes between the populations. Genes with few changes are more likely to cause  
507 the software to either return an undefined result or to reach the maximum  $\omega$  the  
508 software allows. In addition, genes with either no nonsynonymous or no synonymous  
509 changes were also removed. This yielded a total of 9,087 genes that were used in the  
510 analysis. Histograms of a  $\log_2$  transformation of the  $\omega$  values were produced using JMP  
511 10. A comparison between the  $\log_2$  transformations of the NG Ka/Ks and the omega  
512 value from model 0 of codeml was generated with JMP 10.

513         The length of each gene's coding sequence was extracted from the PHYLIP  
514 sequence headers. This was to determine if genes with longer length have significantly  
515 different omega values. Genes were binned based on length and an ANOVA with post-  
516 hoc Tukey test using JMP 10 was used to compare length bins for significance. Intron  
517 data was extracted from the reference genome annotation using Geneious 8.1. Based



518 on this, genes were binned based on the number of exons. ANOVA with post-hoc  
519 Tukey test in JMP 10 compared the bin sets for significant difference in omega. To  
520 determine if there was a significant difference in omega between genes present on each  
521 Muller element ANOVA with post-hoc Tukey test was used in JMP 10 to compare  
522 omega value distribution on each element.

### 523 **Expression analysis**

524 Previous transcriptional studies provided differential expression data for cactus  
525 host shifts [43] and between populations [44]. Loci that were found to be significant with  
526 codeml model 7 and 8 were removed from this analysis. The model 0 omega for loci  
527 with a FDR significance greater than 0.001 for third-instar larva from the *D. mojavensis*  
528 Sonora population that were raised on agria cactus rot was compared to non-significant  
529 loci using ANOVA in JMP 10. Comparison of model 0 omega between FDR significant  
530 loci and non-significant loci was also done for differential expression between third-  
531 instar larva of the four host populations with ANOVA in JMP 10.

532 To explore the relationship between omega and gene expression level RNAseq  
533 data from [47] was retrieved for whole male and female *D. mojavensis* flies as aligned  
534 BAM files. Differential expression was calculated by using edgeR [124] to look for  
535 genes with significantly higher male or female expression. Box plots of omega model 0  
536 for genes with significant male or female expressed genes as well as genes without sex  
537 based expression were compared using ANOVA with post-hoc Tukey test in JMP 10.  
538 Average adjusted (+0.25)  $\log_2$  RPKM of non-sex biased genes was plotted against  $\log_2$   
539 omega model 0 and linear regression was performed on the data with JMP 10.

## 540 **Gene ontology terms analysis**

541 Network graphs were generated using Cytoscape 3.2.1 [125] with the add-on app  
542 ClueGO 2.2.5 [126]. GO term and KEGG pathway data used was from the June 2016  
543 release. The custom *D. melanogaster* reference set was used for analysis. Both the  
544 TOP10 and PAML-FDR genes were run on, biological processes, molecular function  
545 and KEGG terms. Data for GO term summary tables was retrieved from FlyBase  
546 version FB2017\_06 *D. melanogaster* release 6.19 [111]. For each *D. mojavensis* gene  
547 with a *D. melanogaster* ortholog, GO term summaries were phrased from the FlyBase  
548 GO Summary Ribbons for molecular function and biological process. Clustering done  
549 with JMP 10 using the Ward method and 15 groups allowed.

## 550 **Abbreviations**

551 X

## 552 **Availability of data and materials**

553 X

## 554 **Competing interests**

555 The authors declare that they have no competing interests.

## 556 **Authors' contributions**

557 CWA performed the assembly and analysis of the genomic data and was involved in the  
558 writing of the manuscript. LMM conceived of and designed the study, was involved in

559 the analysis and the writing of the manuscript. All authors read and approved the final  
560 manuscript.

### 561 **Acknowledgements**

562 The authors greatly acknowledge the work of Laurel Brandsmeier in this project. This  
563 work was supported by a Junior Faculty Distinguished Research award from the  
564 University of Alabama in Huntsville and partly supported by a grant from the National  
565 Science Foundation (DEB-1219387 and IOS-1557697 to LMM).

566

567 **References**

- 568 1. Feder ME, Mitchell-Olds T. Evolutionary and ecological functional genomics. Nature  
569 Review Genetics 2003, 4:649-655.
- 570 2. Stapley J, Reger J, Feulner PGD, Smadja C, Galindo J, Ekblom R, Bennison C, Ball  
571 AD, Beckerman AP, Slate J. Adaptation genomics: the next generation. Trends in  
572 Ecology & Evolution 2010, 25(12):705-712.
- 573 3. Barrett RDH, Hoekstra HE. Molecular spandrels: tests of adaptation at the genetic  
574 level. Nature Reviews Genetics 2011, 12(11):767-780.
- 575 4. Storz JF, Wheat CW. Integrating Evolutionary and Functional Approaches to Infer  
576 Adaptation at Specific Loci. Evolution 2010, 64(9):2489-2509.
- 577 5. Ungerer MC, Johnson LC, Herman MA. Ecological genomics: understanding gene  
578 and genome function in the natural environment. Heredity 2008, 100(2):178-183.
- 579 6. Nosil P. Ecological Speciation. Oxford: Oxford University Press; 2012.
- 580 7. Rundle HD, Nosil P. Ecological speciation. Ecology Letters 2005, 8(3):336-352.
- 581 8. Funk DJ. Isolating a role for natural selection in speciation: Host adaptation and  
582 sexual isolation in *Neochlamisus bebbianae* leaf beetles. Evolution 1998,  
583 52(6):1744-1759.
- 584 9. Wu CI, Ting CT. Genes and speciation. Nat Rev Genet 2004, 5(2):114-122.
- 585 10. Feder JL, Opp SB, Wlazlo B, Reynolds K, Go W, Spisak S. Host Fidelity Is an  
586 Effective Premating Barrier between Sympatric Races of the Apple Maggot Fly. Proc  
587 Natl Acad Sci 1994, 91(17):7990-7994.

- 588 11. Funk DJ, Egan SP, Nosil P. Isolation by adaptation in *Neochlamisus* leaf beetles:  
589 host-related selection promotes neutral genomic divergence. *Mol Ecol* 2011,  
590 20(22):4671-4682.
- 591 12. Egan SP, Janson EM, Brown CG, Funk DJ. Postmating isolation and genetically  
592 variable host use in ecologically divergent host forms of *Neochlamisus bebbianae*  
593 leaf beetles. *J Evol Biol* 2011, 24(10):2217-2229.
- 594 13. Nielsen R, Bustamante C, Clark AG, Glanowski S, Sackton TB, Hubisz MJ, Fledel-  
595 Alon A, Tanenbaum DM, Civello D, White TJ *et al.* A scan for positively selected  
596 genes in the genomes of humans and chimpanzees. *Plos Biology* 2005, 3(6):976-  
597 985.
- 598 14. Clark AG, Glanowski S, Nielsen R, Thomas PD, Kejariwal A, Todd MA, Tanenbaum  
599 DM, Civello D, Lu F, Murphy B *et al.* Inferring nonneutral evolution from human-  
600 chimp-mouse orthologous gene trios. *Science* 2003, 302(5652):1960-1963.
- 601 15. Bustamante CD, Fledel-Alon A, Williamson S, Nielsen R, Hubisz MT, Glanowski S,  
602 Tanenbaum DM, White TJ, Sninsky JJ, Hernandez RD *et al.* Natural selection on  
603 protein-coding genes in the human genome. *Nature* 2005, 437(7062):1153-1157.
- 604 16. Kosiol C, Vinar T, da Fonseca RR, Hubisz MJ, Bustamante CD, Nielsen R, Siepel A.  
605 Patterns of Positive Selection in Six Mammalian Genomes. *Plos Genet* 2008, 4(8).
- 606 17. Consortium DG. Evolution of genes and genomes on the *Drosophila* phylogeny.  
607 *Nature* 2007, 450(7167):203-218.
- 608 18. Yang Z. The power of phylogenetic comparison in revealing protein function. *Proc*  
609 *Natl Acad Sci* 2005, 102(9):3179-3180.

- 610 19. Pool JE, Corbett-Detig RB, Sugino RP, Stevens KA, Cardeno CM, Crepeau MW,  
611 Duchen P, Emerson JJ, Saelao P, Begun DJ *et al.* Population Genomics of sub-  
612 saharan *Drosophila melanogaster*: African diversity and non-African admixture. Plos  
613 Genet 2012, 8(12):e1003080.
- 614 20. Langley CH, Stevens K, Cardeno C, Lee YC, Schrider DR, Pool JE, Langley SA,  
615 Suarez C, Corbett-Detig RB, Kolaczkowski B *et al.* Genomic variation in natural  
616 populations of *Drosophila melanogaster*. Genetics 2012, 192(2):533-598.
- 617 21. Bergland AO, Tobler R, Gonzalez J, Schmidt P, Petrov D. Secondary contact and  
618 local adaptation contribute to genome-wide patterns of clinal variation in *Drosophila*  
619 *melanogaster*. Mol Ecol 2016, 25(5):1157-1174.
- 620 22. Campo D, Lehmann K, Fjeldsted C, Souaiaia T, Kao J, Nuzhdin SV. Whole-genome  
621 sequencing of two North American *Drosophila melanogaster* populations reveals  
622 genetic differentiation and positive selection. Mol Ecol 2013, 22(20):5084-5097.
- 623 23. Grenier JK, Arguello JR, Moreira MC, Gottipati S, Mohammed J, Hackett SR,  
624 Boughton R, Greenberg AJ, Clark AG. Global Diversity Lines-A Five-Continent  
625 Reference Panel of Sequenced *Drosophila melanogaster* Strains. G3-Genes Genom  
626 Genet 2015, 5(4):593-603.
- 627 24. Pool JE. The Mosaic Ancestry of the *Drosophila* Genetic Reference Panel and the  
628 *D. melanogaster* Reference Genome Reveals a Network of Epistatic Fitness  
629 Interactions. Mol Biol Evol 2015, 32(12):3236-3251.
- 630 25. Shiao MS, Chang JM, Fan WL, Lu MY, Notredame C, Fang S, Kondo R, Li WH.  
631 Expression Divergence of Chemosensory Genes between *Drosophila sechellia* and

- 632 Its Sibling Species and Its Implications for Host Shift. *Genome Biol Evol* 2015,  
633 7(10):2843-2858.
- 634 26. Chiu JC, Jiang XT, Zhao L, Hamm CA, Cridland JM, Saelao P, Hamby KA, Lee EK,  
635 Kwok RS, Zhang GJ *et al.* Genome of *Drosophila suzukii*, the Spotted Wing  
636 *Drosophila*. *G3-Genes Genom Genet* 2013, 3(12):2257-2271.
- 637 27. Matzkin LM. Ecological Genomics of Host Shifts in *Drosophila mojavensis*. *Adv Exp*  
638 *Med Biol* 2014, 781(781):233-247.
- 639 28. Heed WB. Ecology and genetics of Sonoran desert *Drosophila*. In: *Ecological*  
640 *genetics: The interface*. Edited by Brussard PF: Springer-Verlag; 1978: 109-126.
- 641 29. Reed LK, Nyboer M, Markow TA. Evolutionary relationships of *Drosophila*  
642 *mojavensis* geographic host races and their sister species *Drosophila arizonae*. *Mol*  
643 *Ecol* 2007, 16(5):1007-1022.
- 644 30. Matzkin LM, Eanes WF. Sequence variation of alcohol dehydrogenase (*Adh*)  
645 paralogs in cactophilic *Drosophila*. *Genetics* 2003, 163:181-194.
- 646 31. Matzkin LM. The Molecular Basis of Host Adaptation in Cactophilic *Drosophila*:  
647 Molecular Evolution of a Glutathione S-Transferase Gene (*GstD1*) in *Drosophila*  
648 *mojavensis*. *Genetics* 2008, 178(2):1073-1083.
- 649 32. Matzkin LM. Population genetics and geographic variation of alcohol dehydrogenase  
650 (*Adh*) paralogs and glucose-6-phosphate dehydrogenase (*G6pd*) in *Drosophila*  
651 *mojavensis*. *Mol Biol Evol* 2004, 21(2):276-285.
- 652 33. Smith G, Lohse K, Etges WJ, Ritchie MG. Model-based comparisons of  
653 phylogeographic scenarios resolve the intraspecific divergence of cactophilic  
654 *Drosophila mojavensis*. *Mol Ecol* 2012, 21(13):3293-3307.

- 655 34. Starmer WT. Analysis of the Community Structure of Yeasts Associated with the  
656 Decaying Stems of Cactus. I. *Stenocereus gummosus*. Microb Ecol 1982, 8(1):71-  
657 81.
- 658 35. Starmer WT. Associations and Interactions Among Yeasts, *Drosophila* and Their  
659 Habitats. In: Ecological genetics and evolution: The cactus-yeast-*Drosophila* model  
660 system. Edited by Barker JSF, Starmer WT. New York: Academic Press; 1982: 159-  
661 174.
- 662 36. Fogleman JC, Starmer WT. Analysis of the community structure of yeasts  
663 associated with the decaying stems of cactus. III. *Stenocereus thurberi*. Microb Ecol  
664 1985, 11(2):165-173.
- 665 37. Starmer WT, Lachance MA, Phaff HJ, Heed WB. The biogeography of yeasts  
666 Associated with decaying cactus tissue in North America, the Caribbean, and  
667 Northern Venezuela. In: Evolutionary Biology. Edited by Hecht MK, Wallace B,  
668 Macintyre RJ, vol. 24: Plenum Publishing Corporation; 1990: 253-296.
- 669 38. Fellows DF, Heed WB. Factors affecting host plant selection in desert-adapted  
670 cactiphilic *Drosophila*. Ecology 1972, 53:850-858.
- 671 39. Kircher HW. Chemical composition of cacti and its relationship to Sonoran Desert  
672 *Drosophila*. In: Ecological genetics and evolution: The cactus-yeast-*Drosophila*  
673 model system. Edited by Barker JSF, Starmer WT. New York: Academic Press;  
674 1982: 143-158.
- 675 40. Fogleman JC, Abril JR. Ecological and evolutionary importance of host plant  
676 chemistry. In: Ecological and evolutionary genetics of *Drosophila*. Edited by Barker  
677 JSF, Starmer WT, MacIntyre RJ. New York: Plenum Press; 1990: 121-143.



- 678 41. Fogleman JC, Danielson PB. Chemical interactions in the cactus-microorganism-  
679 *Drosophila* model system of the Sonoran Desert. *American Zoologist* 2001,  
680 41(4):877-889.
- 681 42. Matzkin LM, Watts TD, Bitler BG, Machado CA, Markow TA. Functional genomics of  
682 cactus host shifts in *Drosophila mojavensis*. *Mol Ecol* 2006, 15:4635-4643.
- 683 43. Matzkin LM. Population transcriptomics of cactus host shifts in *Drosophila*  
684 *mojavensis*. *Mol Ecol* 2012, 21(10):2428-2439.
- 685 44. Matzkin LM, Markow TA. Transcriptional differentiation across the four cactus host  
686 races of *Drosophila mojavensis*. In: *Speciation: Natural Processes, Genetics and*  
687 *Biodiversity*. Edited by Michalak P. Hauppauge: Nova Science Publishers Inc.; 2013:  
688 119-136.
- 689 45. Zhang Z, Li J, Zhao XQ, Wang J, Wong GK, Yu J. KaKs\_Calculator: Calculating Ka  
690 and Ks through model selection and model averaging. *Genomics, proteomics &*  
691 *bioinformatics* 2006, 4(4):259-263.
- 692 46. Yang ZH. PAML 4: Phylogenetic analysis by maximum likelihood. *Mol Biol Evol*  
693 2007, 24(8):1586-1591.
- 694 47. Graveley BR, Brooks AN, Carlson J, Duff MO, Landolin JM, Yang L, Artieri CG, van  
695 Baren MJ, Boley N, Booth BW *et al.* The developmental transcriptome of *Drosophila*  
696 *melanogaster*. *Nature* 2011, 471(7339):473-479.
- 697 48. Wasserman M. Cytological and Phylogenetic Relationships in the Repleta Group of  
698 the Genus *Drosophila*. *Proc Natl Acad Sci* 1960, 46(6):842-859.
- 699 49. Riddle NC, Elgin SCR. The *Drosophila* Dot Chromosome: Where Genes Flourish  
700 Amidst Repeats. *Genetics* 2018, 210(3):757-772.

- 701 50. Bridges CB. Salivary chromosome maps with a key to the banding of the  
702 chromosomes of *Drosophila melanogaster*. J Hered 1935, 26(2):60-64.
- 703 51. Singh ND, Petrov DA. Evolution of Gene Function on the X Chromosome Versus the  
704 Autosomes. Gene and Protein Evolution 2007, 3:101-118.
- 705 52. Thornton K, Bachtrog D, Andolfatto P. X chromosomes and autosomes evolve at  
706 similar rates in *Drosophila*: No evidence for faster-X protein evolution. Genome  
707 Research 2006, 16(4):498-504.
- 708 53. Leung W, Shaffer CD, Reed LK, Smith ST, Barshop W, Dirkes W, Dothager M, Lee  
709 P, Wong J, Xiong D *et al.* *Drosophila* Muller F elements maintain a distinct set of  
710 genomic properties over 40 million years of evolution. G3 2015, 5(5):719-740.
- 711 54. Ruiz A, Heed WB, Wasserman M. Evolution of the Mojavensis cluster of cactophilic  
712 *Drosophila* with descriptions of two new species. J Hered 1990, 81:30-42.
- 713 55. Hasson E, Eanes WF. Contrasting histories of three gene regions associated with  
714 In(3L)Payne of *Drosophila melanogaster*. Genetics 1996, 144(4):1565-1575.
- 715 56. Larracuente AM, Sackton TB, Greenberg AJ, Wong A, Singh ND, Sturgill D, Zhang  
716 Y, Oliver B, Clark AG. Evolution of protein-coding genes in *Drosophila*. Trends in  
717 Genetics 2008, 24(3):114-123.
- 718 57. Blencowe BJ. Exonic splicing enhancers: mechanism of action, diversity and role in  
719 human genetic diseases. Trends Biochem Sci 2000, 25(3):106-110.
- 720 58. Hawkins JD. A Survey on Intron and Exon Lengths. Nucleic Acids Res 1988,  
721 16(21):9893-9908.

- 722 59. Comeron JM, Guthrie TB. Intragenic Hill-Robertson interference influences selection  
723 intensity on synonymous mutations in *Drosophila*. *Mol Biol Evol* 2005, 22(12):2519-  
724 2530.
- 725 60. Hill WG, Robertson A. Effect of Linkage on Limits to Artificial Selection. *Genet Res*  
726 1966, 8(3):269-294.
- 727 61. Drummond DA, Bloom JD, Adami C, Wilke CO, Arnold FH. Why highly expressed  
728 proteins evolve slowly. *Proc Natl Acad Sci* 2005, 102(40):14338-14343.
- 729 62. Wilke CO, Drummond DA. Population genetics of translational robustness. *Genetics*  
730 2006, 173(1):473-481.
- 731 63. Pal C, Papp B, Hurst LD. Highly expressed genes in yeast evolve slowly. *Genetics*  
732 2001, 158(2):927-931.
- 733 64. Akashi H. Gene expression and molecular evolution. *Curr Opin Genet Dev* 2001,  
734 11(6):660-666.
- 735 65. Nuzhdin S, Wayne M, Harmon K, McIntyre L. Common pattern of evolution of gene  
736 expression level and protein sequence in *Drosophila*. *Mol Biol Evol* 2004,  
737 21(7):1308-1317.
- 738 66. Zhang Z, Hambuch TM, Parsch J. Molecular evolution of sex-biased genes in  
739 *Drosophila*. *Mol Biol Evol* 2004, 21(11):2130-2139.
- 740 67. Grath S, Parsch J. Sex-Biased Gene Expression. *Annu Rev Genet* 2016, 50:29-44.
- 741 68. Meisel RP. Towards a More Nuanced Understanding of the Relationship between  
742 Sex-Biased Gene Expression and Rates of Protein-Coding Sequence Evolution. *Mol*  
743 *Biol Evol* 2011, 28(6):1893-1900.

- 744 69. Swanson WJ, Vacquier VD. The rapid evolution of reproductive proteins. Nature  
745 Reviews Genetics 2002, 3(2):137-144.
- 746 70. Bono JM, Markow TA. Post-zygotic isolation in cactophilic *Drosophila*: larval viability  
747 and adult life-history traits of *D. mojavensis*/*D. arizonae* hybrids. J Evol Biol 2009,  
748 22(7):1387-1395.
- 749 71. Bono JM, Matzkin LM, Hoang K, Brandsmeier L. Molecular evolution of candidate  
750 genes involved in post-mating-prezygotic reproductive isolation. J Evol Biol 2015,  
751 28(2):403-414.
- 752 72. Bono JM, Matzkin LM, Kelleher ES, Markow TA. Postmating transcriptional changes  
753 in reproductive tracts of con- and heterospecifically mated *Drosophila mojavensis*  
754 females. Proc Natl Acad Sci 2011, 108(19):7878-7883.
- 755 73. Kelleher ES, Markow TA. Reproductive tract interactions contribute to isolation in  
756 *Drosophila*. Fly 2007, 1(1):33-37.
- 757 74. Knowles LL, Markow TA. Sexually antagonistic coevolution of a postmating-  
758 prezygotic reproductive character in desert *Drosophila*. Proc Natl Acad Sci 2001,  
759 98(15):8692-8696.
- 760 75. Krebs RA, Markow TA. Courtship behavior and control of reproductive isolation in  
761 *Drosophila mojavensis*. Evolution 1989, 43:908-913.
- 762 76. Markow TA. Sexual isolation among populations of *Drosophila mojavensis*. Evolution  
763 1991, 45:1525-1529.
- 764 77. Pitnick S, Miller GT, Schneider K, Markow TA. Ejaculate-female coevolution in  
765 *Drosophila mojavensis*. P Roy Soc B-Biol Sci 2003, 270(1523):1507-1512.

- 766 78. Etges WJ, Heed WB. Sensitivity to larval density in populations of *Drosophila*  
767 *mojavensis*: Influences of host plant variation on components fitness. *Oecologia*  
768 1987, 71:375-381.
- 769 79. Etges WJ. Direction of life history evolution in *Drosophila mojavensis*. In: Ecological  
770 and evolutionary genetics of *Drosophila*. Edited by Barker JSF, Starmer WT,  
771 MacIntyre RJ. New York: Plenum Press; 1990: 37-56.
- 772 80. Casida JE, Quistad GB. Serine hydrolase targets of organophosphorus toxicants.  
773 *Chem-Biol Interact* 2005, 157:277-283.
- 774 81. Luque T, O'Reilly DR. Functional and phylogenetic analyses of a putative *Drosophila*  
775 *melanogaster* UDP-glycosyltransferase gene. *Insect Biochem Mol Biol* 2002,  
776 32(12):1597-1604.
- 777 82. Ranson H, Rossiter L, Ortelli F, Jensen B, Wang XL, Roth CW, Collins FH,  
778 Hemingway J. Identification of a novel class of insect Glutathione S-transferases  
779 involved in resistance to DDT in the malaria vector *Anopheles gambiae*. *Biochem J*  
780 2001, 359:295-304.
- 781 83. Ranson H, Hemingway J. Glutathione Transferases. In: *Comprehensive Molecular*  
782 *Insect Science*. Edited by Gilbert LI, Iatrou K, Gill SS, vol. 5. Amsterdam: Elsevier;  
783 2005: 383-402.
- 784 84. Feyereisen R. Insect Cytochrome P450. In: *Comprehensive Molecular Insect*  
785 *Science*. Edited by Gilbert LI, Iatrou K, Gill SS, vol. 4. Amsterdam: Elsevier; 2005: 1-  
786 77.
- 787 85. Li XC, Schuler MA, Berenbaum MR. Molecular mechanisms of metabolic resistance  
788 to synthetic and natural xenobiotics. *Annu Rev Entomol* 2007, 52:231-253.

- 789 86. Guillen Y, Rius N, Delprat A, Williford A, Muyas F, Puig M, Casillas S, Ramia M,  
790 Egea R, Negre B *et al.* Genomics of Ecological Adaptation in Cactophilic *Drosophila*.  
791 *Genome Biology and Evolution* 2015, 7(1):349-366.
- 792 87. Rane RV, Pearce SL, Li F, Coppin C, Schiffer M, Shirriffs J, Sgro CM, Griffin PC,  
793 Zhang G, Lee SF *et al.* Genomic changes associated with adaptation to arid  
794 environments in cactophilic *Drosophila* species. *BMC Genomics* 2019, 20(1):52.
- 795 88. Foster JLM, Fogleman JC. Identification and Ecology of Bacterial Communities  
796 Associated with Necroses of 3 Cactus Species. *Appl Environ Microb* 1993, 59(1):1-  
797 6.
- 798 89. Foster J, Fogleman J. Bacterial succession in necrotic tissue of *Agria cactus*  
799 (*Stenocereu gummosus*). *Appl Environ Microb* 1994, 60(2):619-625.
- 800 90. Schlenke T, Begun D. Natural selection drives *Drosophila* immune system evolution.  
801 *Genetics* 2003, 164(4):1471-1480.
- 802 91. Markow TA. Assortative fertilization in *Drosophila*. *Proc Natl Acad Sci* 1997,  
803 94(15):7756-7760.
- 804 92. Fogleman JC, Starmer WT, Heed WB. Larval Selectivity for Yeast Species by  
805 *Drosophila mojavensis* in Natural Substrates. *Proc Natl Acad Sci* 1981, 78(7):4435-  
806 4439.
- 807 93. Coleman JM, Benowitz KM, Jost AG, Matzkin LM. Behavioral evolution  
808 accompanying host shifts in cactophilic *Drosophila* larvae. *Ecology and Evolution*  
809 2018, 8(14):6921-6931.
- 810 94. Vosshall LB, Stocker RE. Molecular architecture of smell and taste in *Drosophila*.  
811 *Annu Rev Neurosci* 2007, 30:505-533.

- 812 95. McBride CS, Arguello JR. Five *Drosophila* genomes reveal nonneutral evolution and  
813 the signature of host specialization in the chemoreceptor superfamily. *Genetics*  
814 2007, 177(3):1395-1416.
- 815 96. Arguello JR, Cardoso-Moreira M, Grenier JK, Gottipati S, Clark AG, Benton R.  
816 Extensive local adaptation within the chemosensory system following *Drosophila*  
817 *melanogaster's* global expansion. *Nature Communications* 2016, 7.
- 818 97. McBride CS. Rapid evolution of smell and taste receptor genes during host  
819 specialization in *Drosophila sechellia*. *Proc Natl Acad Sci* 2007, 104(12):4996-5001.
- 820 98. Newby BD, Etges WJ. Host preference among populations of *Drosophila mojavensis*  
821 (Diptera: Drosophilidae) that use different host cacti. *Journal of Insect Behavior*  
822 1998, 11(5):691-712.
- 823 99. Date P, Dweck HKM, Stensmyr MC, Shann J, Hansson BS, Rollmann SM.  
824 Divergence in Olfactory Host Plant Preference in *D. mojavensis* in Response to  
825 Cactus Host Use. *Plos One* 2013, 8(7).
- 826 100. Date P, Crowley-Gall A, Diefendorf AF, Rollmann SM. Population differences in  
827 host plant preference and the importance of yeast and plant substrate to volatile  
828 composition. *Ecology and Evolution* 2017, 7(11):3815-3825.
- 829 101. Diaz F, Allan CW, Matzkin LM. Positive selection at sites of chemosensory genes  
830 is associated with the recent divergence and local ecological adaptation in  
831 cactophilic *Drosophila*. *BMC Evol Biol* 2018, 18.
- 832 102. Wolfner MF. The gifts that keep on giving: Physiological functions and  
833 evolutionary dynamics of male seminal proteins in *Drosophila*. *Heredity* 2002, 88:85-  
834 93.

- 835 103. Avila FW, Sirot LK, LaFlamme BA, Rubinstein CD, Wolfner MF. Insect seminal  
836 fluid proteins: identification and function. *Annu Rev Entomol* 2011, 56:21-40.
- 837 104. Findlay GD, Sitnik JL, Wang W, Aquadro CF, Clark NL, Wolfner MF. Evolutionary  
838 rate covariation identifies new members of a protein network required for *Drosophila*  
839 *melanogaster* female post-mating responses. *Plos Genet* 2014, 10(1):e1004108.
- 840 105. Kelleher ES, Pennington JE. Protease gene duplication and proteolytic activity in  
841 *Drosophila* female reproductive tracts. *Mol Biol Evol* 2009, 26(9):2125-2134.
- 842 106. Kelleher ES, Swanson WJ, Markow TA. Gene duplication and adaptive evolution  
843 of digestive proteases in *Drosophila arizonae* female reproductive tracts. *Plos Genet*  
844 2007, 3(8):1541-1549.
- 845 107. Kelleher ES, Watts TD, LaFlamme BA, Haynes PA, Markow TA. Proteomic  
846 analysis of *Drosophila mojavensis* male accessory glands suggests novel classes of  
847 seminal fluid proteins. *Insect Biochem Mol Biol* 2009, 39(5-6):366-371.
- 848 108. Tritt A, Eisen JA, Facciotti MT, Darling AE. An Integrated Pipeline for de Novo  
849 Assembly of Microbial Genomes. *Plos One* 2012, 7(9).
- 850 109. Simpson JT, Durbin R. Efficient de novo assembly of large genomes using  
851 compressed data structures. *Genome Research* 2012, 22(3):549-556.
- 852 110. Lassmann T, Hayashizaki Y, Daub CO. TagDust-A program to eliminate artifacts  
853 from next generation sequencing data. *Bioinformatics* 2009, 25(21):2839-2840.
- 854 111. Gramates LS, Marygold SJ, dos Santos G, Urbano JM, Antonazzo G, Matthews  
855 BB, Rey AJ, Tabone CJ, Crosby MA, Emmert DB *et al.* FlyBase at 25: Looking to the  
856 future. *Nucleic Acids Res* 2017, 45(D1):D663-D671.



- 857 112. Schaeffer SW, Bhutkar A, McAllister BF, Matsuda M, Matzkin LM, O'Grady PM,  
858 Rohde C, Valente VLS, Aguade M, Anderson WW *et al.* Polytene Chromosomal  
859 Maps of 11 *Drosophila* Species: The Order of Genomic Scaffolds Inferred From  
860 Genetic and Physical Maps. *Genetics* 2008, 179(3):1601-1655.
- 861 113. Li H, Handsaker B, Wysoker A, Fennell T, Ruan J, Homer N, Marth G, Abecasis  
862 G, Durbin R, Proc GPD. The Sequence Alignment/Map format and SAMtools.  
863 *Bioinformatics* 2009, 25(16):2078-2079.
- 864 114. Darling AC, Mau B, Blattner FR, Perna NT. Mauve: multiple alignment of  
865 conserved genomic sequence with rearrangements. *Genome Res* 2004, 14(7):1394-  
866 1403.
- 867 115. Rice P, Longden I, Bleasby A. EMBOSS: The European molecular biology open  
868 software suite. *Trends in Genetics* 2000, 16(6):276-277.
- 869 116. Edgar RC. MUSCLE: Multiple sequence alignment with high accuracy and high  
870 throughput. *Nucleic Acids Res* 2004, 32(5):1792-1797.
- 871 117. Nei M, Gojobori T. Simple Methods for Estimating the Numbers of Synonymous  
872 and Nonsynonymous Nucleotide Substitutions. *Mol Biol Evol* 1986, 3(5):418-426.
- 873 118. Stajich JE, Block D, Boulez K, Brenner SE, Chervitz SA, Dagdigian C, Fuellen G,  
874 Gilbert JGR, Korf I, Lapp H *et al.* The bioperl toolkit: Perl modules for the life  
875 sciences. *Genome Research* 2002, 12(10):1611-1618.
- 876 119. Tamura K, Peterson D, Peterson N, Stecher G, Nei M, Kumar S. MEGA5:  
877 Molecular Evolutionary Genetics Analysis Using Maximum Likelihood, Evolutionary  
878 Distance, and Maximum Parsimony Methods. *Mol Biol Evol* 2011, 28(10):2731-2739.

- 879 120. Talevich E, Invergo BM, Cock PJA, Chapman BA. Bio.Phylo: A unified toolkit for  
880 processing, analyzing and visualizing phylogenetic trees in Biopython. BMC  
881 Bioinformatics 2012, 13.
- 882 121. Nielsen R, Yang ZH. Likelihood models for detecting positively selected amino  
883 acid sites and applications to the HIV-1 envelope gene. Genetics 1998, 148(3):929-  
884 936.
- 885 122. Goldman N, Yang ZH. Codon-Based Model of Nucleotide Substitution for  
886 Protein-Coding DNA-Sequences. Mol Biol Evol 1994, 11(5):725-736.
- 887 123. Yang ZH, Nielsen R, Goldman N, Pedersen AMK. Codon-substitution models for  
888 heterogeneous selection pressure at amino acid sites. Genetics 2000, 155(1):431-  
889 449.
- 890 124. Robinson MD, McCarthy DJ, Smyth GK. edgeR: a Bioconductor package for  
891 differential expression analysis of digital gene expression data. Bioinformatics 2010,  
892 26(1):139-140.
- 893 125. Shannon P, Markiel A, Ozier O, Baliga NS, Wang JT, Ramage D, Amin N,  
894 Schwikowski B, Ideker T. Cytoscape: A software environment for integrated models  
895 of biomolecular interaction networks. Genome Research 2003, 13(11):2498-2504.
- 896 126. Bindea G, Mlecnik B, Hackl H, Charoentong P, Tosolini M, Kirilovsky A, Fridman  
897 WH, Pages F, Trajanoski Z, Galon J. ClueGO: A Cytoscape plug-in to decipher  
898 functionally grouped gene ontology and pathway annotation networks.  
899 Bioinformatics 2009, 25(8):1091-1093.

900

901

902 **Table 1** Number of cleaned reads and assembled reads for each population.

| Population      | Reads Mapped | Total Reads | Proportion Mapped |
|-----------------|--------------|-------------|-------------------|
| Baja California |              |             |                   |
| ME              | 12,052,662   | 44,912,130  | 0.27              |
| PE              | 88,976,029   | 100,263,663 | 0.89              |
| Total           | 101,028,691  | 145,175,793 | 0.70              |
| Mojave          |              |             |                   |
| ME              | 26,638,794   | 52,910,406  | 0.50              |
| PE              | 73,196,313   | 83,000,942  | 0.88              |
| Total           | 99,835,107   | 135,911,348 | 0.73              |
| Sonora          |              |             |                   |
| ME              | 39,962,094   | 63,240,890  | 0.63              |
| PE              | 93,857,309   | 105,723,406 | 0.89              |
| Total           | 133,819,403  | 168,964,296 | 0.79              |

903 ME mate pair end reads; PE paired end reads

904

905 Figure legends

906 **Fig. 1** Distribution of the four cactus host populations of *D. mojavensis*.

907 **Fig. 2** Boxplot of  $\log_2 \omega$  values for loci located in each of the *D. mojavensis* Muller  
908 elements. Elements with different letters are significantly different using a Tukey HSD  
909 test (see Table S2).

910 **Fig. 3** Boxplot of  $\log_2 \omega$  values for loci in five different coding length bins. Bins with  
911 different letters are significantly different using a Tukey HSD test (see Table S3).

912 **Fig. 4** Proportion of TOP10 loci that show female-bias, male-bias or unbiased gene  
913 expression. Dashed line indicates the genome wide proportion of TOP10 loci (0.10).  
914 Gene expression data is from (Gravelly et al 2011). Asterisk indicate significance via  
915 Fisher's Exact test (\*  $P < 0.05$ , \*\*  $P < 0.01$ , \*\*\*  $P < 0.001$ ).

916 **Fig. 5** Functional clustering of Biological Process GO terms of the TOP10 loci. Details  
917 of gene composition of each cluster is in Additional file 3: Table S11.

918 **Fig. 6** Network clustering of Biological Process GO terms of the TOP10 loci. Network  
919 clustering was performed using ClueGo using the following parameters: Min GO Level =  
920 3, Max GO Level = 8, All GO Levels = false, Number of Genes = 3, Get All Genes =  
921 false, Min Percentage = 5.0, Get All Percentage = false, GO Fusion = true, GO Group =  
922 true, Kappa Score Threshold = 0.3, Over View Term = Smallest PValue, Group By  
923 Kappa Statistics = true, Initial Group Size = 1, Sharing Group Percentage = 50.0.

924

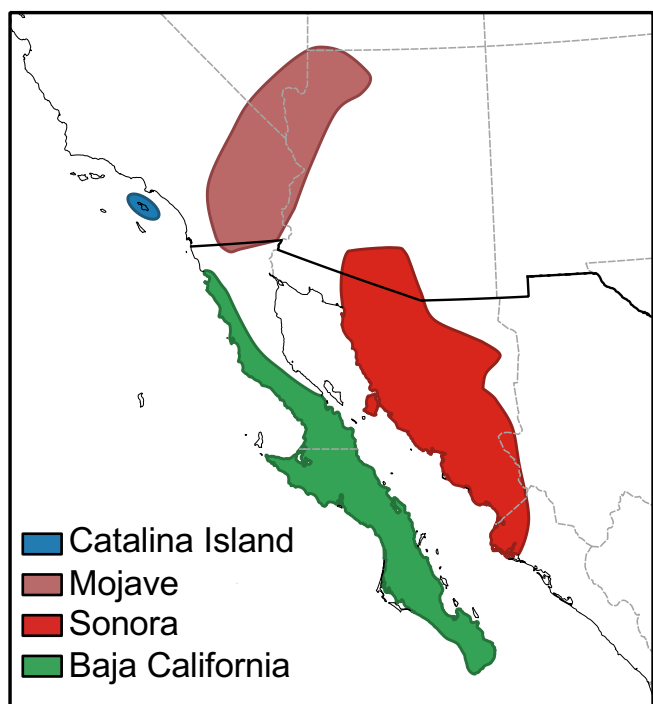

**Fig. 1** Distribution of the four cactus host populations of *D. mojavensis*.

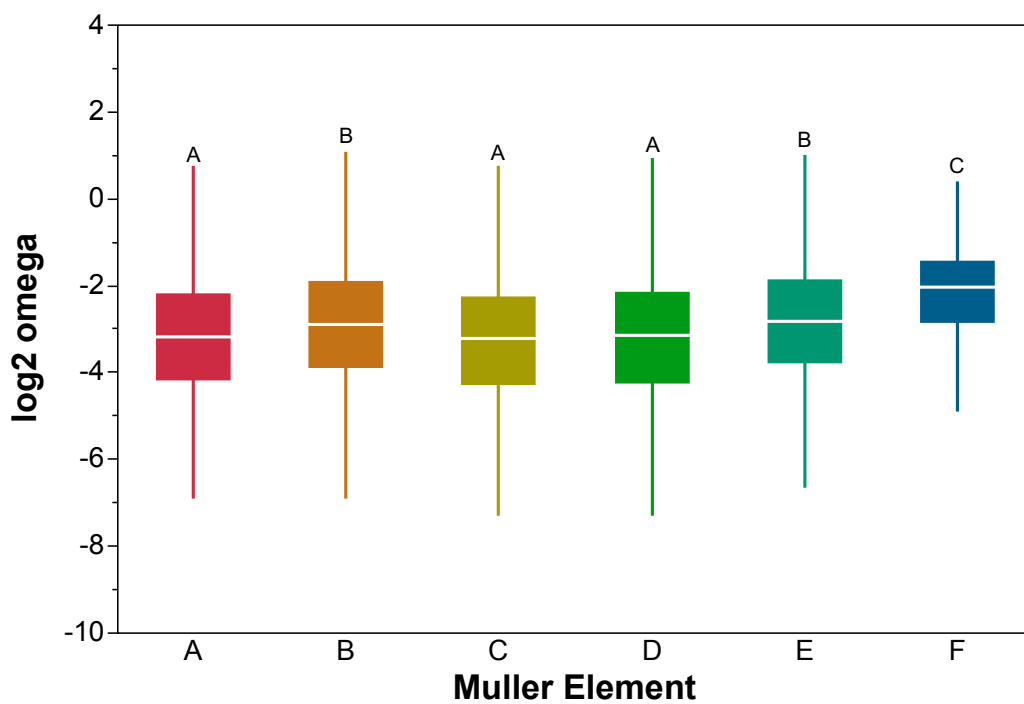

**Fig. 2** Boxplot of  $\log_2 \omega$  values for loci located in each of the *D. mojavensis* Muller elements. Elements with different letters are significantly different using a Tukey HSD test (see Table S2).

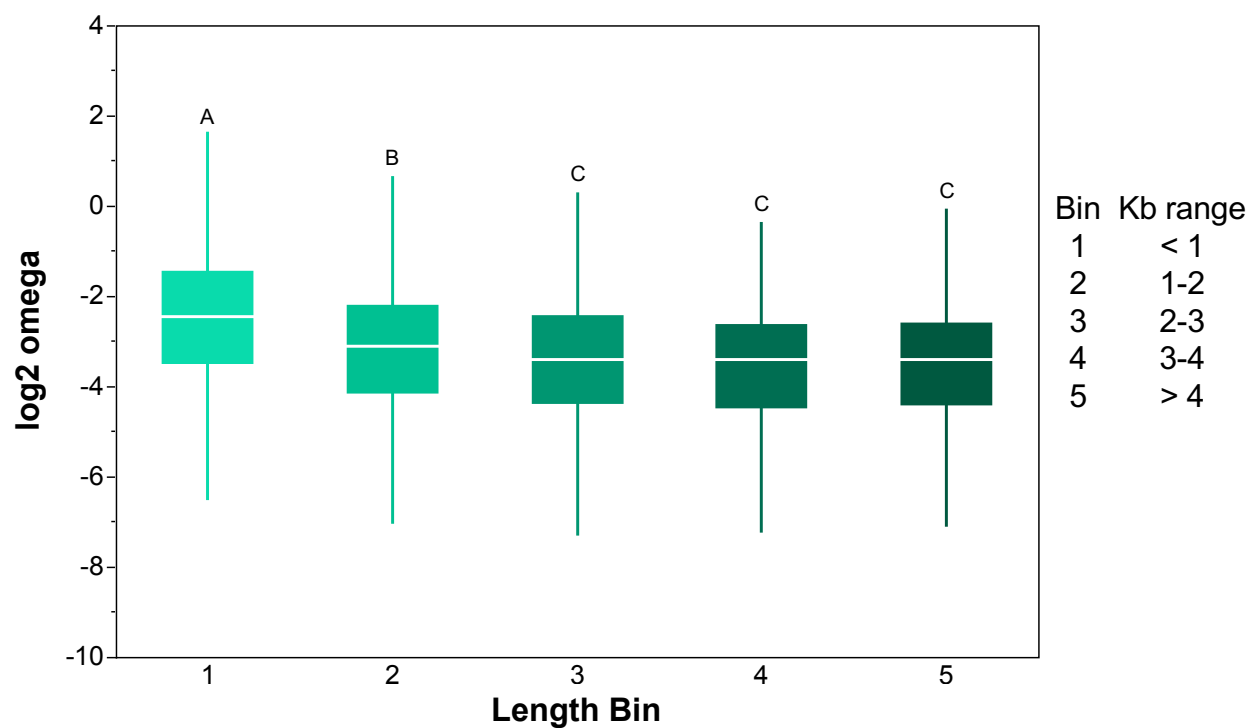

**Fig. 3** Boxplot of  $\log_2 \omega$  values for loci in five different coding length bins. Bins with different letters are significantly different using a Tukey HSD test (see Table S3).

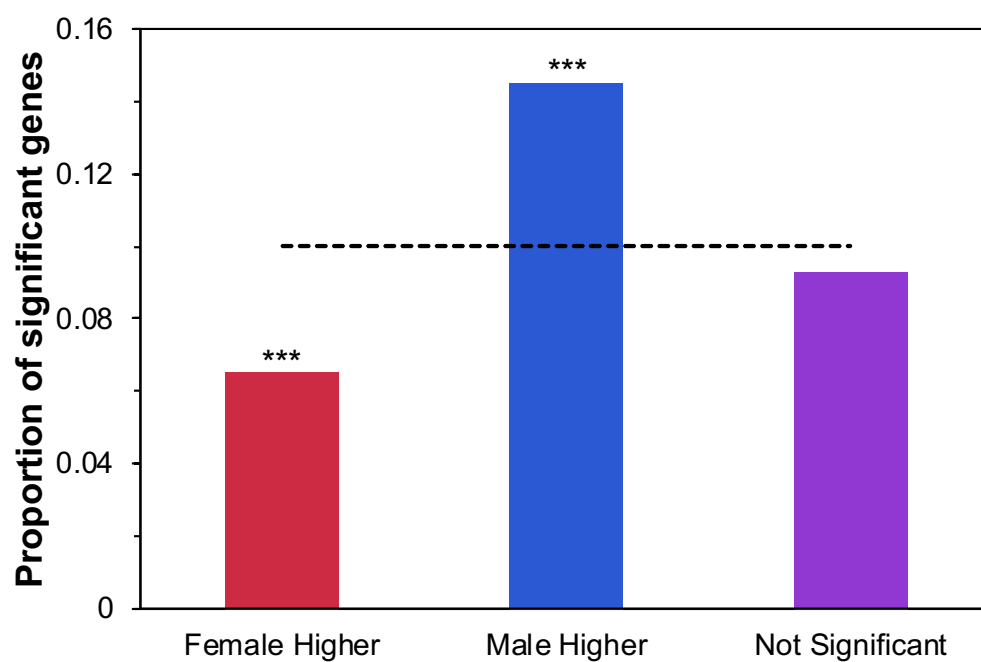

**Fig. 4** Proportion of TOP10 loci that show female-bias, male-bias or unbiased gene expression. Dashed line indicates the genome wide proportion of TOP10 loci (0.10). Gene expression data is from (Gravely et al 2011). Asterisk indicate significance via Fisher's Exact test (\*  $P < 0.05$ , \*\*  $P < 0.01$ , \*\*\*  $P < 0.001$ ).



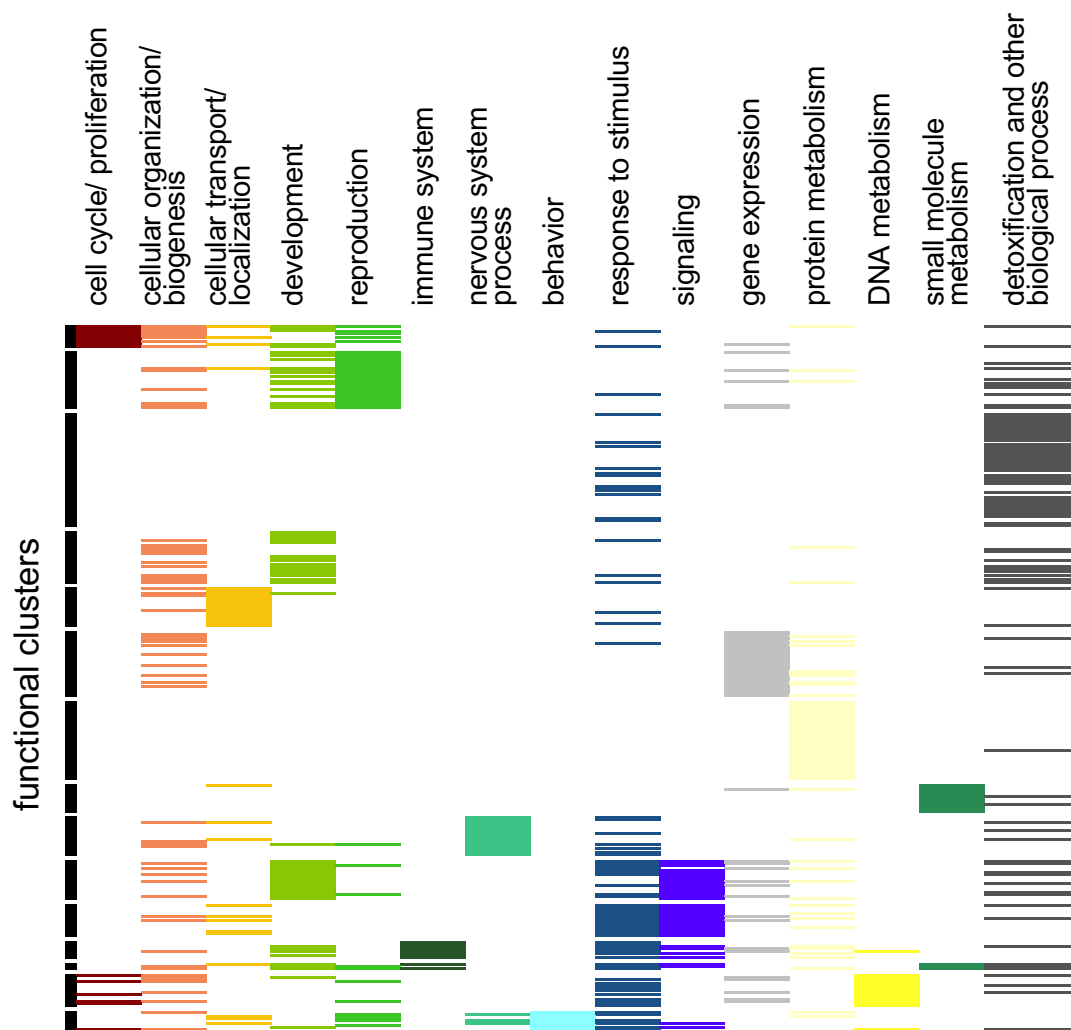

**Fig. 5** Functional clustering of Biological Process GO terms of the TOP10 loci. Details of gene composition of each cluster is in Additional file 3: Table S11.

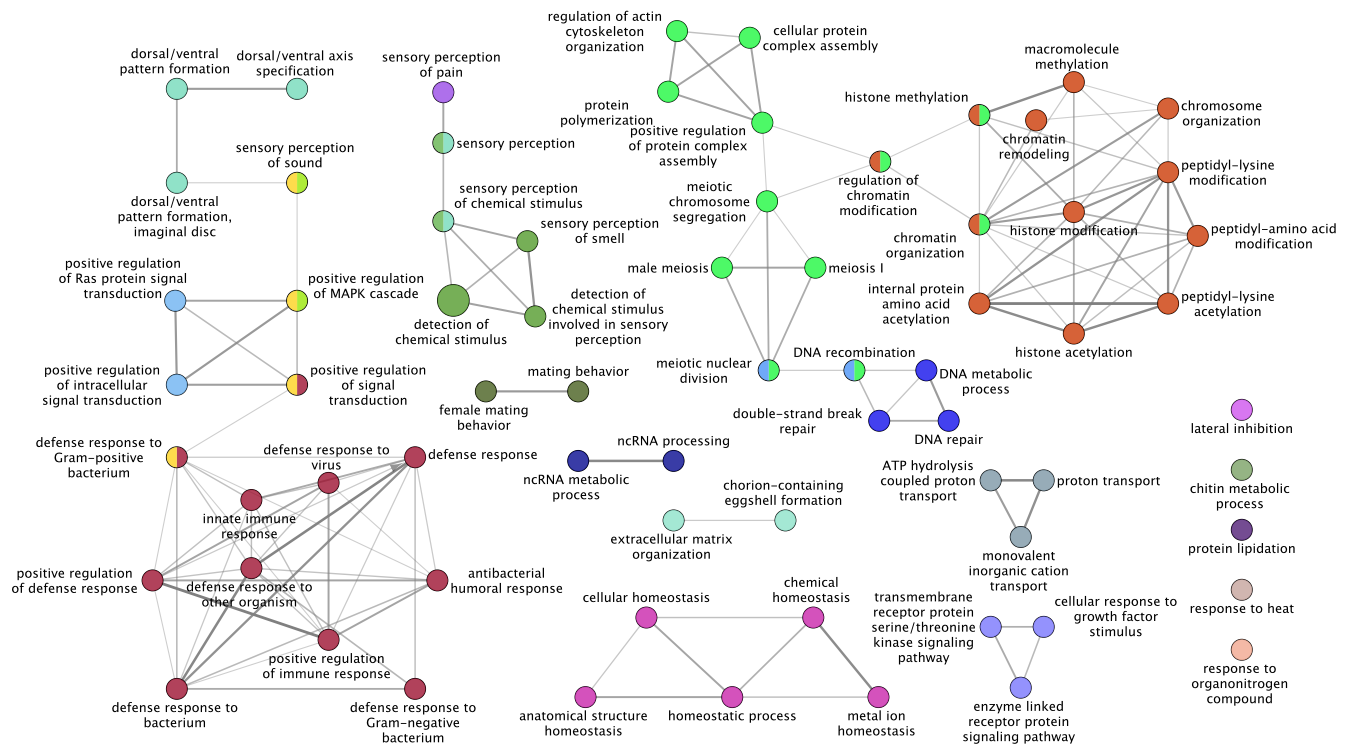

**Fig. 6** Network clustering of Biological Process GO terms of the TOP10 loci. Network clustering was performed using ClueGo using the following parameters: Min GO Level = 3, Max GO Level = 8, All GO Levels = false, Number of Genes = 3, Get All Genes = false, Min Percentage = 5.0, Get All Percentage = false, GO Fusion = true, GO Group = true, Kappa Score Threshold = 0.3, Over View Term = Smallest PValue, Group By Kappa Statistics = true, Initial Group Size = 1, Sharing Group Percentage = 50.0.
